1 **Title: Community carriage of ESBL-producing *Escherichia coli* and *Klebsiella***  
2 ***pneumoniae*: A cross-sectional study of risk factors and comparative genomics of**  
3 **carriage and clinical isolates**

4 **Authors:** Niclas Raffelsberger (ORCID 0000-0002-9463-8915)<sup>a,b\*</sup>, Dorota Julia Buczek  
5 (ORCID 0000-0002-2282-6298)<sup>b</sup>, Kristian Svendsen (ORCID 0000-0003-3481-3539)<sup>c</sup>, Lars  
6 Småbrekke (ORCID 0000-0001-6475-3368)<sup>c</sup>, Anna Kaarina Pöntinen (ORCID 0000-0002-  
7 3160-2042)<sup>d,e</sup>, Iren H. Löhr (ORCID 0000-0002-8847-0044)<sup>f</sup>, Lotte Leonore Eivindsdatter  
8 Andreassen<sup>a</sup>, Gunnar Skov Simonsen (ORCID 0000-0003-0043-7045)<sup>a,b</sup>, Norwegian *E. coli*  
9 ESBL Study Group<sup>g</sup>, Arnfinn Sundsfjord (ORCID 0000-0002-3728-2270)<sup>b,d</sup>, Kirsten  
10 Gravningen (ORCID 0000-0002-8194-3208)<sup>a,h,i#</sup>, Ørjan Samuelsen (ORCID 0000-0002-  
11 5525-2614)<sup>c,d#</sup>

12 <sup>a</sup>*Department of Microbiology and Infection Control, University Hospital of North Norway,*  
13 *Tromsø, Norway*

14 <sup>b</sup>*Department of Medical Biology, Faculty of Health Sciences, UiT The Arctic University of*  
15 *Norway, Tromsø, Norway*

16 <sup>c</sup>*Department of Pharmacy, Faculty of Health Sciences, UiT The Arctic University of Norway,*  
17 *Tromsø, Norway*

18 <sup>d</sup>*Norwegian National Advisory Unit on Detection of Antimicrobial Resistance, Department of*  
19 *Microbiology and Infection Control, University Hospital of North Norway, Tromsø, Norway*

20 <sup>e</sup>*Department of Biostatistics, University of Oslo, Oslo, Norway*

21 <sup>f</sup>*Department of Medical Microbiology, Stavanger University Hospital, Stavanger, Norway*

22 <sup>g</sup>*Collaborators forming the Norwegian E. coli ESBL Study Group are listed in the*  
23 *Acknowledgement.*

24 <sup>h</sup>*Department of Microbiology and Infection Control, Akershus University Hospital,*  
25 *Nordbyhagen, Norway*

26 <sup>i</sup>*Division of Medicine and Laboratory Sciences, Institute of Clinical Medicine, University of*  
27 *Oslo, Oslo, Norway*

28 # equal contribution

29 \*Corresponding author: Niclas Raffelsberger, Correspondence address: Department of  
30 Microbiology and Infection Control, University Hospital of North Norway, N-9038 Tromsø,  
31 Norway E-mail: [niclas.raffelsberger@unn.no](mailto:niclas.raffelsberger@unn.no)

32

33

34

35

36

37

38

39

40

41

42

43

44

45 **Abstract**

46 The global prevalence of infections caused by ESBL-producing Enterobacterales (ESBL-E) is  
47 increasing and for *Escherichia coli* observations indicate that this is partly driven by  
48 community-onset cases. The ESBL-E population structure in the community is scarcely  
49 described and data on risk factors for carriage are conflicting. Here, we report the prevalence  
50 and population structure of fecal ESBL-producing *E. coli* and *Klebsiella pneumoniae* (ESBL-  
51 Ec/Kp) in a general adult population, examine risk factors, and compare carriage isolates with  
52 contemporary clinical isolates.

53 Fecal samples obtained from 4999 participants (54% women)  $\geq 40$  years in the seventh survey  
54 of the population-based Tromsø Study, Norway (2015-2016) were screened for ESBL-Ec/Kp.  
55 In addition, we included 118 ESBL-Ec clinical isolates from the Norwegian surveillance  
56 program in 2014. All isolates were whole-genome sequenced. Risk factors associated with  
57 carriage were analyzed using multivariable logistic regression.

58 ESBL-Ec gastrointestinal carriage prevalence was 3.3% (95% CI 2.8-3.9%, no sex difference)  
59 and 0.08% (0.02-0.20%) for ESBL-Kp. For ESBL-Ec, travel to Asia was the only  
60 independent risk factor (AOR 3.47, 95% CI 2.18-5.51). *E. coli* ST131 was most prevalent in  
61 both collections. However, the ST131 proportion was significantly lower in carriage (24%)  
62 vs. clinical isolates (58%,  $p < 0.001$ ). Carriage isolates were genetically more diverse with a  
63 higher proportion of phylogroup A (26% vs. 5%,  $p < 0.001$ ), indicating that ESBL gene  
64 acquisition occurs in a variety of *E. coli* lineages colonizing the gut. STs commonly related to  
65 extra-intestinal infections were more frequent in clinical isolates also carrying a higher  
66 prevalence of antimicrobial resistance, which could indicate clone associated pathogenicity.

67 **Keywords:** *Escherichia coli*, *Klebsiella pneumoniae*, Extended-spectrum  $\beta$ -lactamase,  
68 antimicrobial resistance, carriage, risk factors, general population, bacterial genomics

69 **Importance**

70 ESBL-producing *E. coli* (ESBL-Ec) and *K. pneumoniae* (ESBL-Kp) are major pathogens in  
71 the global burden of antimicrobial resistance. However, there is a gap in knowledge  
72 concerning the bacterial population structure of human ESBL-Ec/Kp carriage isolates in the  
73 community. We have examined ESBL-Ec/Kp isolates from a population-based study and  
74 compared these to contemporary clinical isolates. The large genetic diversity of carriage  
75 isolates indicates frequent ESBL gene acquisition, while those causing invasive infections are  
76 more clone dependent and associated with a higher prevalence of antibiotic resistance. The  
77 knowledge of factors associated with ESBL carriage helps to identify patients at risk to  
78 combat the spread of resistant bacteria within the healthcare system. Particularly, previous  
79 travel to Asia stands out as a major risk factor for carriage and should be considered in  
80 selecting empirical antibiotic treatment in critically ill patients.

81

## 82 **Introduction**

83 Extended spectrum  $\beta$ -lactamase (ESBL) producing *Escherichia coli* (ESBL-Ec) and  
84 *Klebsiella pneumoniae* (ESBL-Kp) are major contributors to the global burden of disease due  
85 to antibiotic resistant bacteria.<sup>1</sup> The prevalence of infections caused by ESBL-Ec or ESBL-Kp  
86 is increasing, even in countries with low antibiotic use and availability on prescription only,  
87 like Norway.<sup>2</sup> The mortality of invasive infections with ESBL-producing Enterobacterales  
88 (ESBL-E) ranges from 10-35%, depending on bacterial species, host factors, severity of  
89 disease and initial antibiotic therapy.<sup>3,4</sup> Consequently, ESBL-Ec/Kp are high-priority  
90 pathogens when developing new drugs to combat the threat from antibiotic resistant bacteria.<sup>5</sup>  
91 ESBL-Ec/Kp colonization precedes invasive infections<sup>6-8</sup> and recent reviews report an  
92 increasing global prevalence of human ESBL-E carriage in the community, with an 8-fold rise  
93 over the past two decades.<sup>9,10</sup> The highest prevalence is detected in Asian and African regions  
94 (20-70%), the lowest in Europe and the Americas (<10%).<sup>9,10</sup> A study from the USA shows  
95 that the increased incidence of ESBL-Ec infections was driven by an increase in community-  
96 onset cases<sup>11</sup>, and human-to-human transmission was the attributable source to 60% of  
97 community-acquired gastrointestinal ESBL-Ec carriage in the Netherlands<sup>12</sup>.

98 Several risk factors for ESBL-E gastrointestinal carriage have been described. However, these  
99 have, with a few exceptions<sup>13,14</sup>, mainly been investigated in small and/or selected study  
100 populations, such as international travelers<sup>15</sup>, patients with gastroenteritis<sup>16</sup>, patients recruited  
101 by general practitioners<sup>17</sup>, persons with recent healthcare contact<sup>18</sup>, pregnant women<sup>19</sup>,  
102 children<sup>20</sup> or persons living in a livestock-dense area<sup>21</sup>. Many studies have identified  
103 international travel as a risk factor for ESBL acquisition, whilst the significance of sex, age,  
104 antibiotic or proton pump inhibitor use, hospitalization and diet are conflicting.<sup>13-15,17,18,22-24</sup>

105 We have comprehensive knowledge of the prevalence and population structure of clinical  
106 ESBL-E isolates showing a dominance of CTX-M-group ESBL enzymes and the association  
107 with specific extraintestinal pathogenic *E. coli* (ExPEC) and multidrug-resistant *K.*  
108 *pneumoniae* high-risk clones.<sup>25-28</sup> Large-scale genomic studies have identified specific  
109 subclades of *E. coli* sequence type (ST) 131 and *K. pneumoniae* ST307 as major contributors  
110 to the increasing prevalence of ESBL infections.<sup>25,27,29,30</sup> Community-based studies from the  
111 Netherlands and Sweden also observed a predominance of ST131, but a high genetic diversity  
112 within the ESBL-Ec population.<sup>13,14</sup>

113 Improved knowledge of risk factors for ESBL-E carriage and their population structure in the  
114 general human population may provide information for risk stratification and targeted  
115 infection control measures. It is important to consider ESBL-E carriage in critically ill septic  
116 patients with respect to the choice of empirical antibiotic treatment. The aims of this study  
117 were to examine the prevalence of, and risk factors associated with, ESBL-Ec/Kp  
118 gastrointestinal carriage in a general adult population in Norway, and to compare the ESBL-  
119 Ec population structure with a national collection of clinical isolates.

## 120 **Results**

121 We detected gastrointestinal carriage of putative ESBL-Ec/Kp in 188 of 4,999 randomly  
122 selected participants who provided fecal samples in the seventh survey of the population-  
123 based Tromsø study (Tromsø7)<sup>31</sup> (Suppl. Table 1, Figure 1). Overall, 87% of participants  
124 receiving a sampling kit returned a fecal sample. In total, 180 Ec and nine Kp putative ESBL-  
125 positive isolates were isolated from the 188 ESBL screening-positive fecal samples. Both  
126 ESBL-Ec and -Kp were detected in one sample.

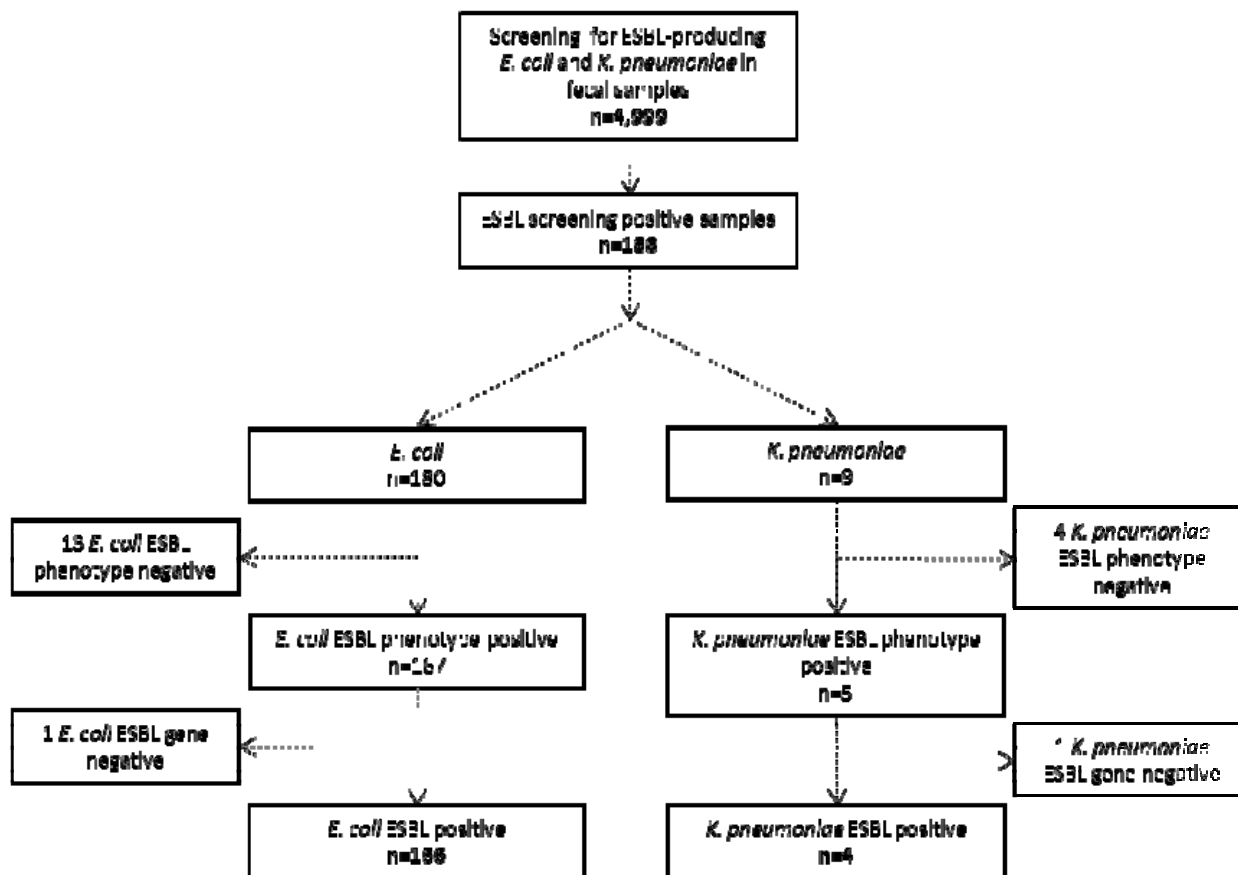

127

128 **Figure 1.** Flowchart and results of fecal sample screening for gastrointestinal carriage of  
 129 ESBL-producing *E. coli* and *K. pneumoniae* in 4,999 participants in Tromsø7, 2015-2016.

130 Pheno- and genotypic analyses showed that 14 putative ESBL-Ec isolates were either pheno-  
 131 and/or genotypically ESBL-negative. Of these, one isolate harbored plasmid-mediated AmpC  
 132 (*bla<sub>CMY-2</sub>*). After exclusion of the ESBL-negative isolates, prevalence of ESBL-Ec  
 133 gastrointestinal carriage was 3.3% (95% confidence interval (CI) 2.8-3.9%, 166 of 4,999  
 134 participants); 3.1% (2.5-3.9%) in women and 3.5% (2.8-4.4%) in men.

135 Among the nine screening ESBL-positive Kp isolates, one harbored *bla<sub>CMY-2</sub>* and four did not  
 136 express an ESBL phenotype. Consequently, four samples were considered positive for ESBL-  
 137 producing Kp, corresponding to a prevalence of 0.08% (0.02-0.20%), all among male  
 138 participants.

139 **Factors associated with gastrointestinal carriage of ESBL-*E. coli***

140 We analyzed data from 4,996 participants, excluding those three who were positive for  
 141 ESBL-Kp only (Suppl. Table 1). Median age was 65 years (interquartile range 58-70 years,  
 142 no sex difference). In multivariable logistic regression analyses adjusted for all explanatory  
 143 variables, only travel to Asia the past 12 months was associated with ESBL-Ec  
 144 gastrointestinal carriage with an adjusted odds ratio (AOR) of 3.47 (2.18-5.51) (Table 1).  
 145 Among participants reporting hospitalization in the past year, or recent use of antibiotics or  
 146 acid suppressive medication, we observed a non-significant increase in prevalence of ESBL-  
 147 Ec.

148 **Table 1.** ESBL-producing *E. coli* gastrointestinal carriage and associated factors among 4,996  
 149 participants in Tromsø7.

| Characteristics                                 | %<br>(ESBL-<br><i>E. coli</i> ) | n<br>(ESBL-<br><i>E. coli</i> ) | N     | AOR  | 95% CI    | p-value |
|-------------------------------------------------|---------------------------------|---------------------------------|-------|------|-----------|---------|
| Age (years)                                     |                                 |                                 |       |      |           | 0.236   |
| 40-49                                           | 3.6                             | 22                              | 605   | 1.00 |           |         |
| 50-59                                           | 4.1                             | 33                              | 814   | 1.15 | 0.66-2.01 |         |
| 60-69                                           | 3.2                             | 68                              | 2,127 | 0.81 | 0.49-1.33 |         |
| 70-84                                           | 3.0                             | 43                              | 1,450 | 0.73 | 0.42-1.26 |         |
| Hospitalization past 12 months                  |                                 |                                 |       |      |           | 0.128   |
| No                                              | 3.3                             | 142                             | 4,341 | 1.00 |           |         |
| Yes                                             | 4.0                             | 24                              | 593   | 1.43 | 0.90-2.27 |         |
| Antibiotic use past 14 days <sup>a</sup>        |                                 |                                 |       |      |           | 0.258   |
| No                                              | 3.3                             | 158                             | 4,831 | 1.00 |           |         |
| Yes                                             | 5.2                             | 8                               | 153   | 1.58 | 0.72-3.47 |         |
| Acid suppressive medication past 4 weeks        |                                 |                                 |       |      |           | 0.951   |
| Not used                                        | 3.3                             | 123                             | 3,760 | 1.00 |           |         |
| ≤weekly                                         | 3.2                             | 13                              | 402   | 1.02 | 0.57-1.83 |         |
| Every week, but not daily                       | 3.5                             | 9                               | 260   | 1.10 | 0.55-2.20 |         |
| Daily                                           | 3.7                             | 11                              | 297   | 1.20 | 0.63-2.26 |         |
| Travel abroad past 12 months <sup>b</sup>       |                                 |                                 |       |      |           | <0.001  |
| No                                              | 2.5                             | 53                              | 2,145 | 1.00 |           |         |
| Other regions (excl. Asia)                      | 3.2                             | 70                              | 2,212 | 1.36 | 0.93-1.98 |         |
| Asia exclusively or Asia + other regions        | 8.2                             | 38                              | 461   | 3.47 | 2.18-5.51 |         |
| Traveler's diarrhea past 12 months <sup>c</sup> |                                 |                                 |       |      |           | 0.972   |
| No                                              | 3.3                             | 156                             | 4,721 | 1.00 |           |         |
| Yes                                             | 4.8                             | 8                               | 166   | 1.01 | 0.48-2.16 |         |

150 ESBL, extended spectrum β-lactamase; N, denominator; AOR, adjusted odds ratio; CI, confidence interval; AOR adjusted for  
 151 age, hospitalization past 12 months, antibiotic use past 14 days, acid suppressive medication past 4 weeks, travel abroad past  
 152 12 months and traveler's diarrhea past 12 months.

153 The multivariable model includes 4,488 participants with complete information on all variables.

154 <sup>a</sup> Have you taken any antibiotics (tablets or oral suspensions, nasal ointments, eye drops or eye ointment) during the past 14  
 155 days?

156 <sup>b</sup> Traveled outside the Nordic countries >1 week duration in the past 12 months.

157 <sup>c</sup> For each travel abroad the past 12 months, the participants were asked if they had experienced diarrhea in connection with  
 158 the travel.

159  
 160



161 Both in the literature and in our previous study<sup>32</sup>, we identified several factors associated with  
162 Kp gastrointestinal carriage, overlapping with those associated with ESBL-Ec  
163 carriage.<sup>15,22,33,34</sup> Thus, in 2,972 participants (of the total 4,996 participants in this current  
164 study) previously screened for Kp, we performed a multivariable logistic regression analysis  
165 including Kp carriage as an additional explanatory variable (Suppl. Table 2). Prevalence of  
166 ESBL-Ec gastrointestinal carriage was 2.7% among participants without Kp carriage and  
167 4.8% (p=0.016) among those with Kp carriage. In the full model, AOR was 1.66 (0.99-2.79,  
168 p=0.055), indicating a possible association between Kp and ESBL-Ec carriage.

### 169 *Comparative analysis of ESBL-E. coli carriage and clinical isolates*

170 To explore the population structure and genomic characteristics of ESBL-Ec in community  
171 carriage we whole-genome sequenced (WGS) all 166 isolates. Furthermore, we sequenced a  
172 contemporary national collection of 118 clinical ESBL-Ec isolates (NORM 2014) for  
173 comparative analysis (Figure 2, Suppl. Table 3).

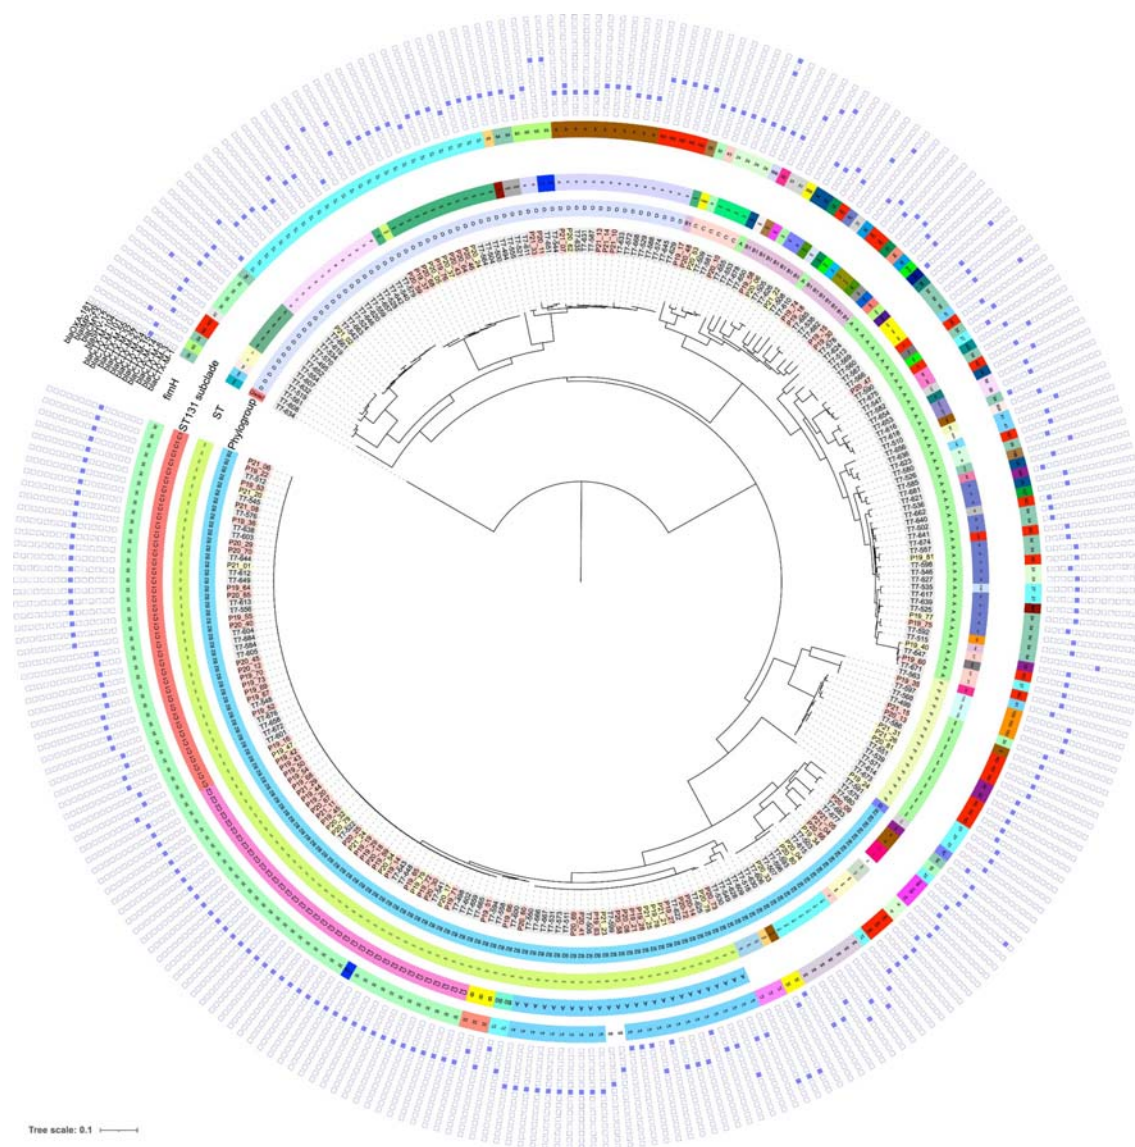

174

175 **Figure 2.** Maximum-likelihood phylogenetic tree based on core genome alignment of the

176 genomes of ESBL-*E. coli* carriage isolates from Tromsø7 (labeled grey, n=166) and clinical

177 isolates from NORM 2014 (blood isolates labeled with red and urine isolates with yellow,

178 n=118). The innermost ring illustrates phylogroups, followed by a ring with sequence types

179 (STs), a ring with ST131 subclades, and a ring with *fimH* types (ND, not detected). The

180 heatmap shows presence (blue color) or absence (white) of ESBL gene variants.

181

182 At the phylogroup level, 52.4% of the ESBL-Ec carriage isolates belonged to either  
 183 phylogroup A (26.5%) or D (25.9%), and 33.7% belonged to phylogroup B2 (Figure 2 and  
 184 Figure 3, Suppl. Table 3). This contrasts with the clinical isolates where 64.4% ( $p<0.001$ ) of  
 185 the isolates belonged to phylogroup B2 and only 20.4% ( $p<0.001$ ) belonged to phylogroup A  
 186 (5.1%) and D (15.3%) combined.

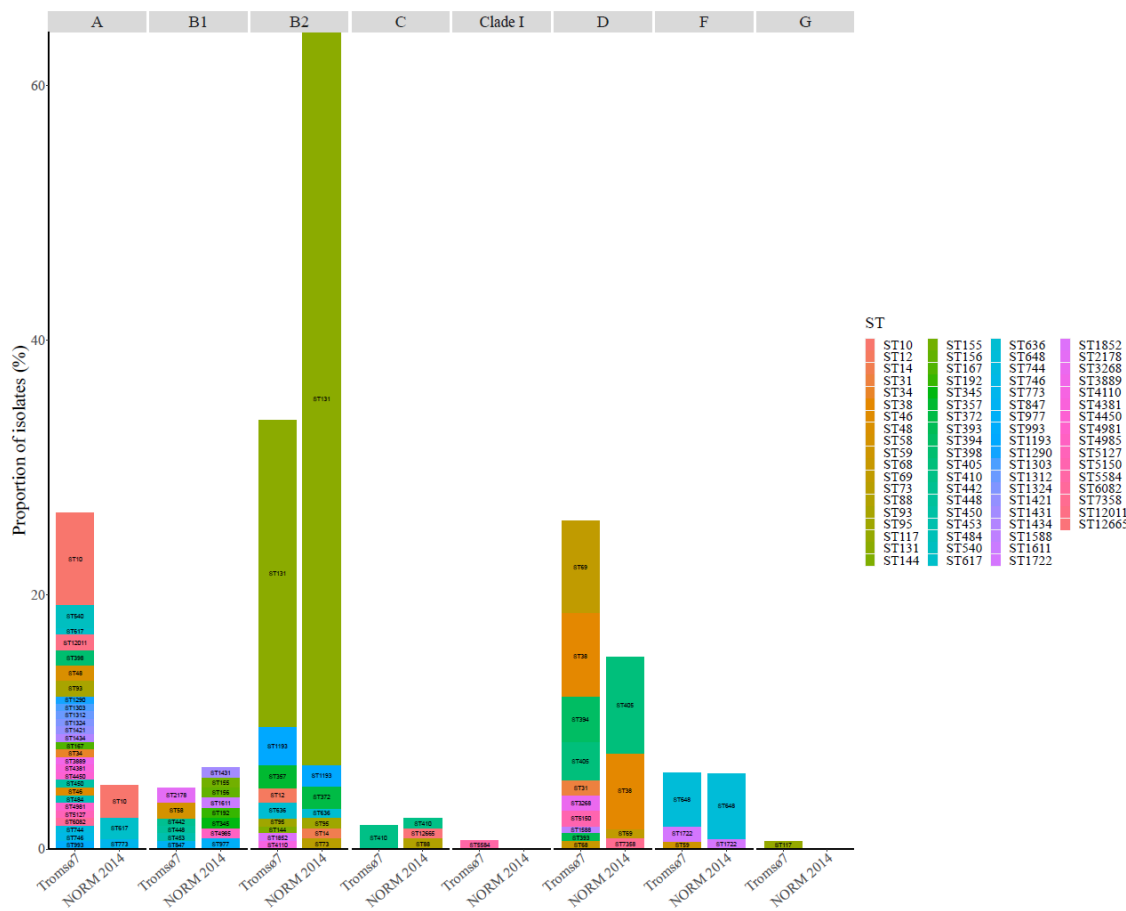

187

188 **Figure 3.** Phylogroup (labeled on the top) and sequence type (ST) distribution of ESBL-*E.*

189 *coli* carriage isolates from Tromsø7 (n=166) and clinical isolates from NORM 2014 (n=118).

190 Carriage isolates had higher ST diversity (Figure 2 and 3, Suppl. Table 3) with Simpson's  
191 diversity index 92.4% compared to clinical isolates (65.9%,  $p<0.001$ ). We identified 58  
192 different STs among the carriage isolates while the clinical isolates included 27 STs (Figure 2  
193 and 3, Suppl. Table 3). ST131 (phylogroup B2) was the dominant ST in both collections,  
194 however, more prevalent among clinical isolates (57.6%,  $n=68$ ) than carriage isolates (24.1%,  
195  $n=40$ ,  $p<0.001$ ). Comparison of prevalence of ESBL-producing ST131 colonization vs.  
196 infection in our study results in a crude odds ratio (OR) for infection of 4.3 (2.57-7.13,  
197  $p<0.001$ ).

198 Within ST131, the multidrug resistant subclades C1 (alternatively referred to as *H30-R*) and  
199 C2 (*H30-Rx*) accounted for 67.5% in carriage and 73.5% clinical isolates (Figure 2, Suppl.  
200 Figure 1, Suppl. Table 3). The subclade C1 (47.5%,  $n=19$ ) was the most prevalent among  
201 carriage isolates and C2 (42.6%,  $n=29$ ) among clinical isolates. The difference in the  
202 proportion of C2 between clinical and carriage isolates was statistically significant (20.0%,  
203  $n=8$ ,  $p=0.017$ ). For the overall ESBL-Ec population, crude OR for infection among C2 was  
204 6.44 (2.82-14.68,  $p<0.001$ ) (Suppl. Table 4).

205 Although non-significant, a higher proportion of subclades A, B and B0, less associated with  
206 antibiotic resistance, was observed among ST131 carriage isolates (32.5%) than clinical  
207 isolates (26.5%,  $p=0.508$ ) (Suppl. Figure 1). However, with regard to the overall ESBL-Ec  
208 population, subclade A was associated with infection (carriage 6.0% vs. clinical 13.6%, OR  
209 2.45, 1.07-5.60,  $p=0.034$ ) (Suppl. Table 4).

210 The most prevalent STs in carriage isolates following ST131 were ST10 (7.2%,  $n=12$ ,  
211 phylogroup A), ST69 (7.2%,  $n=12$ ) and ST38 (6.6%,  $n=11$ , both phylogroup D) compared to  
212 ST405 (7.6%,  $n=9$ ), ST38 (5.9%,  $n=7$ , both phylogroup D), and ST648 (5.1%,  $n=6$ ,  
213 phylogroup F) in clinical isolates (Figure 2 and 3, Suppl. Table 3). We did not identify the

214 common ExPEC lineage ST73<sup>25,29</sup> among the carriage isolates but found one ST95<sup>25,29</sup> (0.6%)  
215 and five isolates of the emerging ST1193<sup>35,36</sup> (3.0%).

216 Using a single nucleotide polymorphism (SNP) cut-off of  $\leq 17$ <sup>37</sup>, we detected two putative  
217 clusters (Suppl. Table 5) among five of 284 isolates. All five were carriage isolates. One  
218 ST357 cluster (6-9 SNP differences) consisted of three isolates and the other cluster of two  
219 ST131 isolates (4 SNP difference). We detected no clusters among the clinical isolates.

## 220 *Antimicrobial resistance and plasmid replicon content*

221 CTX-M enzymes accounted for at least 97.0% of the ESBL phenotypes in both collections  
222 (Figure 2 and Figure 4, Suppl. Table 3). The most prevalent ESBL genes among both carriage  
223 and clinical isolates were *bla*<sub>CTX-M-15</sub> (40.4%, n=67 vs. 61.0%, n=72, p=0.001), *bla*<sub>CTX-M-14</sub>  
224 (20.5%, n=34 vs. 14.4%, n=17, p=0.188), and *bla*<sub>CTX-M-27</sub> (19.9%, n=33 vs. 15.3%, n=18,  
225 p=0.321). One clinical isolate of ST38 harbored both *bla*<sub>CTX-M-15</sub> and *bla*<sub>CTX-M-14</sub>. *Bla*<sub>CTX-M-3</sub>,  
226 *bla*<sub>CTX-M-8</sub>, *bla*<sub>CTX-M-32</sub> and *bla*<sub>CTX-M-101</sub> were exclusively detected in carriage isolates, whereas  
227 *bla*<sub>CTX-M-24</sub> and *bla*<sub>CTX-M-104</sub> were present only in clinical isolates. The remaining ESBL  
228 producers contained *bla*<sub>SHV-12</sub> in 3.0% of the carriage and 1.7% of the clinical isolates. *Bla*<sub>TEM</sub>  
229 ESBL genes were not detected.

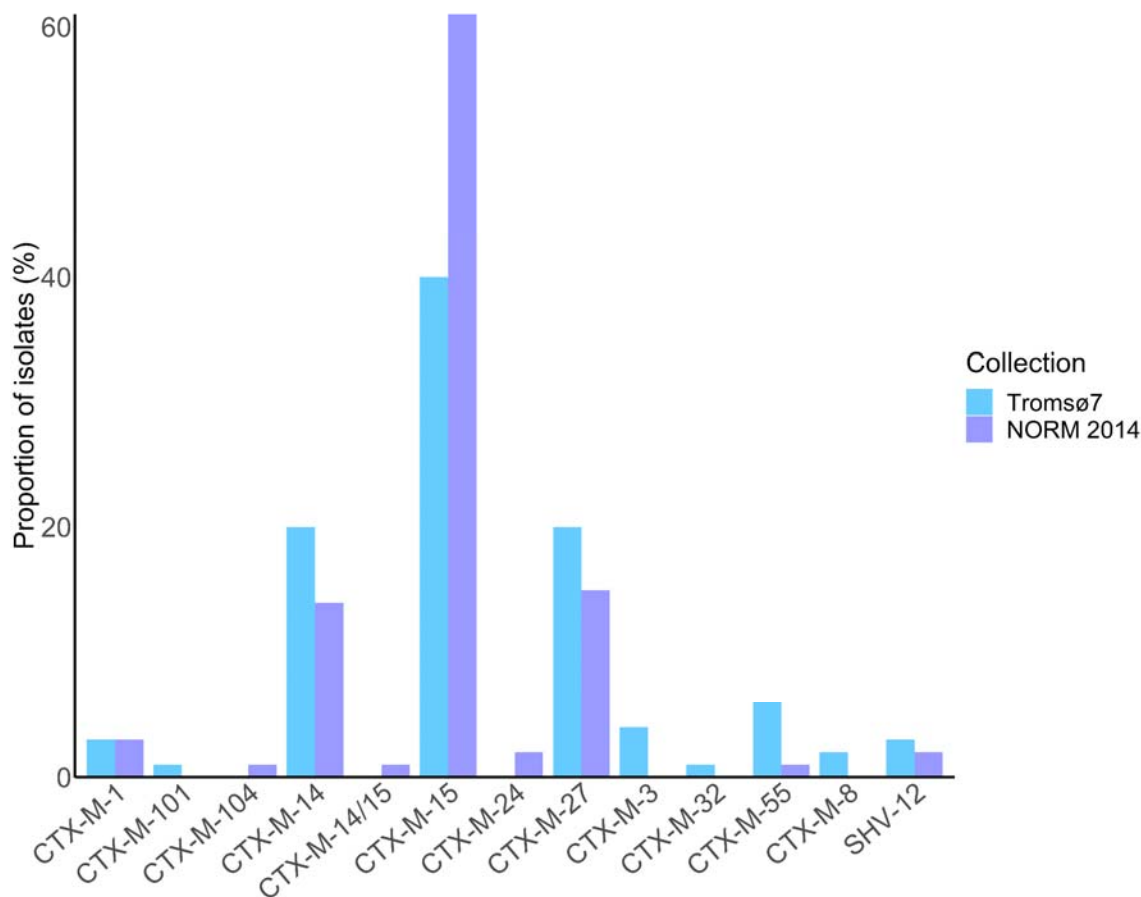

230

231 **Figure 4.** ESBL gene prevalence in ESBL-*E. coli* carriage isolates from the Tromsø7 study

232 (n=166) and clinical isolates from NORM 2014 (n=118).

233 The clinical isolates showed an overall higher proportion of phenotypic resistance compared

234 to the carriage isolates (Table 2, Suppl. Table 3). Only 2.4% of carriage isolates were

235 phenotypically resistant to piperacillin-tazobactam compared to 31.8% ( $p<0.001$ ) of clinical

236 isolates. We also detected a high prevalence of phenotypic co-resistance to non- $\beta$ -lactam

237 antibiotics such as gentamicin, ciprofloxacin and trimethoprim-sulfamethoxazole both in

238 clinical and carriage isolates. Isolates co-resistant to all these three antibiotic classes,

239 accounted for 10.2% (17/166) of carriage and 33.1% (39/118,  $p<0.001$ ) of clinical isolates.

240

241 **Table 2.** Susceptibility profile of ESBL-*E. coli* carriage isolates from Tromsø7 (n=166) and  
 242 clinical isolates from NORM 2014 (n=118).

|                                  | Carriage |      |      | Clinical |      |       |
|----------------------------------|----------|------|------|----------|------|-------|
|                                  | %S       | %I   | %R   | %S       | %I   | %R    |
| Amoxicillin-clavulanic acid i.v. | 57.2     | -    | 42.8 | 25.4     | -    | 74.6  |
| Amoxicillin-clavulanic acid*     | 90.4     | -    | 9.6  | 54.2     | -    | 45.8  |
| Piperacillin-tazobactam          | 97.6     | -    | 2.4  | 68.2†    | -    | 31.8† |
| Cefuroxime*                      | 0.6      | -    | 99.4 | 1.7      | -    | 98.3  |
| Ceftazidime                      | 20.5     | 32.5 | 47.0 | 10.2     | 11.0 | 78.8  |
| Cefotaxime                       | 0.0      | 2.4  | 97.6 | 0.8      | 0.8  | 98.4  |
| Cefepime                         | 7.8      | 54.8 | 37.3 | 4.7†     | 5.9† | 89.4† |
| Ceftazidime-avibactam            | 100.0    | -    | 0.0  | NA       | NA   | NA    |
| Ertapenem                        | 100.0    | -    | 0.0  | NA       | NA   | NA    |
| Meropenem                        | 100.0    | 0.0  | 0.0  | 99.2     | 0.8  | 0.0   |
| Aztreonam                        | 5.4      | 23.5 | 71.1 | NA       | NA   | NA    |
| Amikacin                         | 100.0    | -    | 0.0  | NA       | NA   | NA    |
| Gentamicin                       | 80.1     | -    | 19.9 | 48.3     | -    | 51.7  |
| Tobramycin                       | 76.5     | -    | 23.5 | NA       | NA   | NA    |
| Ciprofloxacin                    | 49.4     | 13.9 | 36.7 | 14.4     | 8.5  | 77.1  |
| Trimethoprim-sulfamethoxazole    | 48.8     | 0.6  | 50.6 | 27.1     | 0.0  | 72.9  |
| Nitrofurantoin                   | 99.4     | -    | 0.6  | 93.9‡    | -    | 6.1‡  |
| Fosfomycin                       | 99.4     | -    | 0.6  | NA       | NA   | NA    |
| Fosfomycin*                      | 96.4     | -    | 3.6  | NA       | NA   | NA    |
| Colistin                         | 98.8     | -    | 1.2  | NA       | NA   | NA    |
| Tigecycline                      | 100.0    | -    | 0.0  | 100.0†   | -    | 0.0†  |

243 S, susceptible; I, susceptible, increased exposure; R, Resistant; i.v. intravenous; NA, not available; \*Breakpoints  
 244 for uncomplicated urinary tract infections; †available for blood culture isolates only (n=85); ‡available for urine  
 245 culture isolates only (n=33)

246

247 Phenotypic ciprofloxacin resistance was different for ST131 (70.0%) vs. non-ST131 (26.2%,  
 248  $p < 0.001$ ) among carriage isolates (Suppl. Table 6) in contrast to the clinical isolates (Suppl.  
 249 Table 7). Two carriage isolates of ST484 and ST1324 (both phylogroup A) were  
 250 phenotypically resistant to colistin and harbored *mcr-1.1* and *mcr-3.5*, respectively. No  
 251 isolates expressed clinical resistance against carbapenems. However, two clinical isolates of  
 252 ST95 (phylogroup B2) and ST410 (phylogroup C) harbored *bla<sub>IMP-26</sub>* and *bla<sub>OXA-181</sub>*,  
 253 respectively. All isolates were susceptible to tigecycline.

254 Despite the overall higher proportion of phenotypic resistance among clinical isolates, the  
 255 average number of different plasmid replicon-types per isolate (both 3.1/isolate) did not differ



256 between the carriage and clinical collections. We identified 43 and 39 different plasmid  
257 replicon types among 97.1% (162/166) carriage and 95.0% (112/118) clinical isolates (Suppl.  
258 Table 3, Suppl. Figure 2). The most prevalent were IncFIB(AP001918) (carriage 22.7% vs.  
259 clinical 22.3%) followed by Col156 (carriage 11.1% vs. clinical 11.5%) and IncFIA (carriage  
260 10.9% vs. clinical 17.7%,  $p=0.101$ ). Replicon type Col156 and IncFIA were mainly detected  
261 in globally disseminated ExPEC clones (ST131, ST1193, ST648, ST69, ST405), whereas  
262 IncFIB(AP001918) was additionally frequently spread among other STs (Suppl. Table 3).

### 263 *ESBL-K. pneumoniae carriage isolates*

264 We detected only four ESBL-Kp, each of a different ST (ST29, ST211, ST261 and ST2459)  
265 harboring *bla*<sub>CTX-M-15</sub> (n=2), *bla*<sub>CTX-M-14</sub> (n=1), or *bla*<sub>SHV-12</sub> (n=1). None of the isolates were  
266 genomically assigned as hypervirulent.

### 267 **Discussion**

268 Our study contributes to the knowledge of prevalence of, and factors associated with, ESBL-  
269 Ec/Kp gastrointestinal carriage in a general adult population, and the bacterial population  
270 structure of carriage isolates. The comparison to a contemporary collection of clinical ESBL-  
271 Ec isolates revealed differences in the population structure and the prevalence of phenotypic  
272 resistance between carriage and clinical isolates. Travel to Asia was identified as a major risk  
273 for ESBL-Ec gastrointestinal carriage.

274 An ESBL-Ec carriage prevalence of 3.3% (2.8-3.9) is lower but comparable to previous  
275 community-based data from Europe including Sweden 4.4% (3.5-5.3, n=2,134, data collected  
276 2012-2013)<sup>13</sup>, the Netherlands 4.5% (3.9-5.1, n=4,177, 2014-2016)<sup>14</sup> and a Norwegian study  
277 4.9% (2.7-8.1, n=284, 2014-2016)<sup>17</sup> using similar screening approaches.

278 We identified significant differences in the ESBL-Ec population structure between the  
279 community and clinical isolates. The globally disseminated phylogroup B2 clone ST131 has



280 been identified as a key contributor to the increase in ESBL prevalence<sup>38</sup> and in a longitudinal  
281 study of *E. coli* bloodstream isolates we identified ST131 to be the single largest contributor  
282 to the increase in prevalence of ESBL-Ec in Norway.<sup>25</sup> We also observed the predominance  
283 of ST131 in both our collections. However, the proportion is significantly lower in carriage  
284 isolates due to lower numbers of the multidrug resistant subclade C2. Moreover, the carriage  
285 population had a higher proportion of phylogroup A, associated with asymptomatic intestinal  
286 carriage in humans<sup>39,40</sup> and a significantly greater ST diversity overall, compared to the  
287 clinical isolates. These observations indicate that acquisition of ESBL genes frequently occur  
288 in a variety of *E. coli* lineages colonizing the gut. However, there are differences in the  
289 colonization potential of *E. coli* lineages and the risk of invasive infection by ESBL-Ec which  
290 seems to be clone dependent.<sup>38,41</sup> The higher odds for infection that we detected for ST131 is  
291 similar to that of the Swedish study (AOR 3.4, 1.8-6.4) indicating a higher pathogenicity  
292 potential of ST131 compared to commensal *E. coli* lineages of phylogroup A, such as ST10.<sup>13</sup>  
293 Moreover, we found that ST131 subclade A, previously reported with less resistance, and the  
294 multidrug resistant subclade C2 had higher odds for infection, and this may contribute to the  
295 sustained establishment of these subclades among bloodstream infections in Norway.<sup>25</sup>

296 Assuming a 100% colonization rate of *E. coli*, the large proportion of STs notorious as  
297 common causes of extra-intestinal clinical infections (e.g. ST131, ST405, ST38 and  
298 ST648)<sup>25,27,28</sup> could at least partly explain the higher prevalence of ESBL among *E. coli*  
299 causing bloodstream infections in Norway (5.8% in 2016)<sup>42</sup> compared to the carriage  
300 prevalence of 3.3% identified here. We also observed emerging clones such as ST1193 which  
301 appears to have disseminated rapidly worldwide over the last decade.<sup>35,36</sup> The low prevalence  
302 of ESBL-Kp gastrointestinal carriage (0.08%) is consistent with previous community based  
303 reports.<sup>9,14,17</sup>

304 The identification of clusters with closely related isolates could indicate putative clonal  
305 spread. This could include within-household and social network transmission or nosocomial  
306 spread. However, we did not have access to epidemiological data to examine this further.

307 In line with other studies, we found a strong association between ESBL-Ec carriage and travel  
308 to Asian regions.<sup>13-15,17,22</sup> This supports the current patient screening recommendations for  
309 ESBL-producing gram-negative bacteria after hospital stay abroad in the past year before  
310 hospital admission in Norway.<sup>43</sup> In contrast to a Swedish and a Dutch study,<sup>15,44</sup> we did not  
311 identify travelers' diarrhea as a risk factor for ESBL-Ec carriage. However, our study was not  
312 designed to specifically investigate international travelers but rather focused on risk factors in  
313 the general adult population.

314 We found no association between ESBL-Ec gut carriage and factors such as hospitalization,  
315 antibiotic use, and acid suppressive medication, and conflicting results have been detected in  
316 previous studies.<sup>22,45</sup> Hospitalization as a risk factor has mainly been reported from studies  
317 investigating patients with ESBL-E infections.<sup>23,46</sup> In line with most studies that assessed risk  
318 factors regarding ESBL-E carriage in individuals in the community, we did not identify  
319 hospitalization as an independent risk factor.<sup>13,22,44</sup> This may be due to the increased ESBL  
320 prevalence not only in hospitals, but also in the community over the last decades and implies  
321 that boundaries have become blurred between those two settings.<sup>9,22,47,48</sup>

322 The nonsignificant effect of antibiotic use is mainly due to limitations of the drug variable in  
323 our study which is based on self-reported data, including topical antibiotics and covers only  
324 the last two weeks before self-sampling. As antibiotic use has been found as a risk factor for  
325 resistance in many other studies,<sup>14,15,22</sup> we cannot rule out that antibiotic use plays a role in  
326 ESBL-E carriage. There are reports identifying an association between the use of gastric acid  
327 suppressive medication and intestinal colonization or infections with ESBL-E.<sup>18,21,23,33,34,46</sup>

328 However, a Dutch study comparable to ours did not find an association between proton pump  
329 inhibitor use and ESBL-E carriage in the overall analysis.<sup>14</sup>

330 Interestingly, we found a possible association between Kp and ESBL-Ec carriage. An  
331 association between ESBL-E carriage and vancomycin-resistant enterococci (VRE) has been  
332 described previously<sup>7,49</sup>, and also that VRE colonization is significantly associated with Kp  
333 colonization among intensive care unit patients.<sup>50</sup> These associations warrant further  
334 investigations to assess if a common set of risk factors for carriage of different clinically  
335 important pathogens can be identified.

336 An important strength of our study is the non-selective recruitment from the official  
337 population-registry, and the high participation (87%) compared to 18.3% and 18.8% in  
338 comprehensive studies from the Netherlands<sup>14</sup> and Sweden<sup>13</sup>, respectively. It is a limitation  
339 that we only captured the general population 40 years and older. However, other studies have  
340 not found an association between age and ESBL-E carriage.<sup>13,14</sup> Moreover, more extensive  
341 data on drug use would have strengthened the analyses. Additionally, the genomic diversity of  
342 carriage isolates is likely to be underestimated due to the isolation and sequencing of only one  
343 colony per fecal sample. Although, we compared local carriage isolates with a national  
344 collection of clinical ESBL-Ec, there was no discernible spatiotemporal spread or  
345 phylogenetic structure within Norway according to a nationwide genomic study on *E. coli*  
346 causing bloodstream infections.<sup>25</sup>

## 347 **Conclusions**

348 The prevalence of ESBL-Ec carriage in a general adult urban Norwegian population was low  
349 reflecting the relatively low prevalence of ESBL-Ec in clinical isolates. Travel to Asia was  
350 the only independent risk factor for ESBL-Ec carriage and should be considered in terms of  
351 screening recommendations before hospital admission. The differences in ESBL-Ec

352 populations between carriage and clinical isolates indicating a higher risk of infection  
353 dependent on the ESBL-Ec clone warrants further investigations to elucidate if risk  
354 stratification should include determination of the bacterial genetic background.

## 355 **Subjects and Methods**

### 356 *Study population and design*

357 Our study sample was drawn from Tromsø7, the last of seven cross-sectional health surveys  
358 conducted between 1974 and 2016 in Tromsø municipality, Norway  
359 (<https://uit.no/research/tromsostudy>). Tromsø is representative of a Northern European, urban  
360 population.<sup>31</sup> Tromsø7 (March 2015- October 2016) included questionnaires and two clinical  
361 visits (<https://uit.no/research/tromsostudy/project?pid=708909>). Unique national identity  
362 numbers from the official population-registry were used to invite all citizens  $\geq 40$  years  
363 (n=32,591). Sixty-five percent (n=21,083, 11,074 women) attended the first clinical visit in  
364 the study (Figure 5).

365

366

367

368

369

370

371

372

373

374

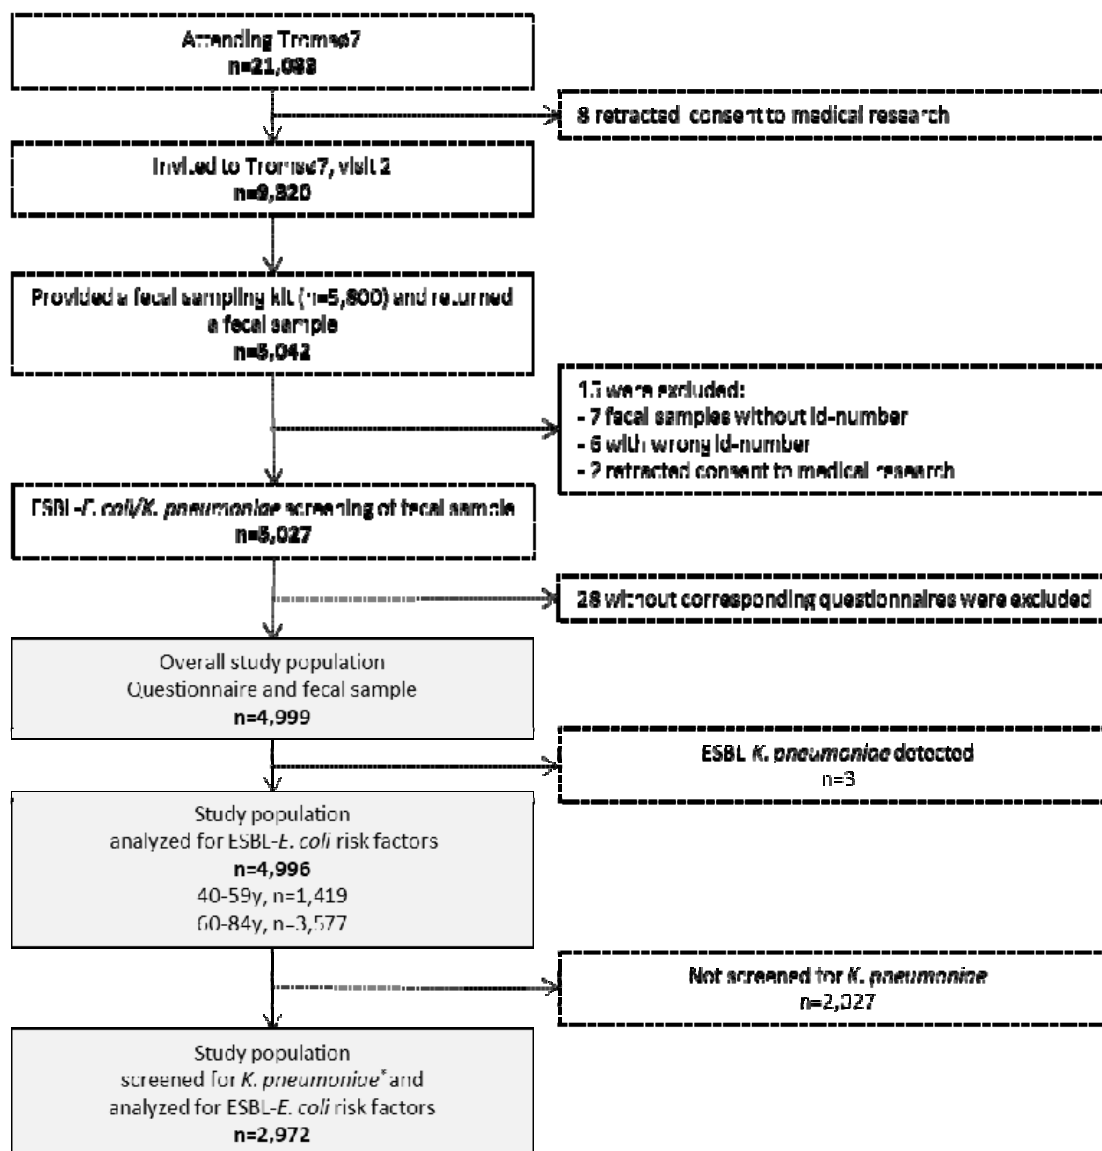

375

376 **Figure 5.** Flow diagram of the study population, Tromsø7, 2015-2016. \*Study population  
377 screened for *K. pneumoniae* carriage is described in.<sup>32</sup>

378 A selection of 9,320 persons attending the first visit, were invited for a second visit, also  
379 including 3,154 former Tromsø Study participants not already included in the random  
380 selection process, which was required for other clinical research purposes. From March 2015  
381 to March 2016, 5,800 participants at the first visit were consecutively provided a fecal self-  
382 sampling kit. Participants collected fecal material using nylon-flocked ESwab 490CE.A

383 (Copan, Brescia, Italy). In total, 87% (n=5,042) returned a sample either at the second visit, or  
384 by mail to the laboratory.

385 All 5,042 fecal samples were screened for the presence of ESBL-producing Ec and Kp via  
386 selective culture (see below). All participants completed two self-administered structured  
387 questionnaires on socio-demographics, smoking, alcohol use, hospitalization, drug use, and  
388 travel abroad. We excluded 13 participants with wrong or missing sample identification  
389 number, two retracting consent to medical research, and 28 with incomplete questionnaires  
390 for a final study population of 4,999 participants (Figure 5). We analyzed the association  
391 between ESBL-Ec gastrointestinal carriage and different risk factors in 4,996 participants  
392 (Figure 5 and Table 1). Next, we investigated the association between ESBL-Ec carriage and  
393 Kp gastrointestinal carriage among 2,972 participants additionally screened for Kp in our  
394 previous study,<sup>32</sup> irrespective of resistance (Figure 5, Supplementary Table 2).

#### 395 ***Isolation of ESBL-producing E. coli and K. pneumoniae***

396 We added 200 µl 85% glycerol to the ESwab tubes upon arrival at the local microbiological  
397 laboratory, and stored the samples at -80°C. From the thawed media, 100 µl were plated onto  
398 CHROMagar<sup>TM</sup> ESBL (CHROMagar, Paris, France) and incubated for 48 hours at 37°C.  
399 Pink, purple and blue colonies suspected of being ESBL-producing Ec or *Klebsiella* spp. were  
400 identified using mass spectrometry (MALDI-TOF, Bruker Daltonics, Bremen, Germany). The  
401 first colony identified as either Ec, *K. pneumoniae* or *K. variicola* from each sample was kept  
402 and further analyzed. All samples were plated on cysteine lactose electrolyte deficient agar  
403 (MAST Group, Bootle, UK) to assess growth of fecal flora and validity of the samples.

#### 404 ***K. pneumoniae isolation***

405 The screening strategy and isolation procedure for Kp, is described in detail elsewhere<sup>32</sup>.  
406 Briefly, we plated and screened the fecal samples onto the selective SCAI (Simons citrate

407 agar with inositol; both Sigma-Aldrich, Darmstadt, Germany) medium and identified  
408 suspected colonies using MALDI-TOF.

#### 409 ***Antimicrobial susceptibility testing and phenotypic ESBL-identification***

410 Susceptibility testing was performed according to the EUCAST broth microdilution method  
411 for carriage isolates, disc diffusion method<sup>51</sup> for the clinical isolates and both interpreted  
412 using the EUCAST 2023 breakpoint table (<https://eucast.org/>). For the confirmation of ESBL-  
413 producing Ec and Kp, we followed the EUCAST algorithm for phenotypic detection of  
414 ESBLs using the BD BBL<sup>TM</sup> combination disk test (Becton Dickinson and Company, Sparks,  
415 USA).

#### 416 ***Genomic sequencing and bioinformatic analysis***

417 Genomic DNA from 166 Ec of the Tromsø7 collection was extracted with the MagNA Pure  
418 96 system (Roche Applied Science, Mannheim, Germany) and sequencing libraries were  
419 prepared according to the Nextera Flex sample preparation protocol (Illumina, San Diego,  
420 CA, USA). Samples were sequenced on the Illumina MiSeq platform to generate 300 bp  
421 paired-end reads. All reads were trimmed with TrimGalore v0.6.4 and assembled with  
422 Unicycler v0.4.8 including SPAdes v3.13.0.<sup>52-54</sup> STs were assigned using the multi locus  
423 sequence type (MLST) software *E.coli* scheme v2.19.0 and Enterobase.<sup>55-57</sup> AMRFinderPlus  
424 v3.10.16 was used to determine resistance genes among the Ec isolates.<sup>58</sup> Plasmid replicons  
425 were identified using Abricate v1.0.1 including the PlasmidFinder 2021-Mar-27 database.<sup>59,60</sup>  
426 Phylogroup assignment was based on ClermonTyping v20.03 (Mar. 2020).<sup>61</sup> The *fimH* type  
427 was identified using FimTyper v1.0 and BLAST+ v2.12.0.<sup>62,63</sup> Regarding the *Klebsiella*  
428 isolates, Kleborate v2.0.0 was used to determine species identification, ST and acquired genes  
429 encoding virulence or antibiotic resistance.<sup>64,65</sup>

430 The clinical ESBL-producing Ec included 118 isolates out of 123 representing all ESBL-Ec  
431 isolates collected in 2014<sup>66</sup>, as part of the yearly surveillance program in NORM. Genome  
432 sequencing of five isolates were unsuccessful. Before sequencing, the NORM 2014 isolates  
433 were stored at -80°C and then sent to GATC Biotech AG (part of Eurofins  
434 Genomics/Eurofins Scientific) in Germany for DNA isolation and WGS. Raw reads were  
435 trimmed using Trimmomatic v0.39 and assembled with SPAdes v3.15.0.<sup>67,68</sup> Contigs shorter  
436 than 200 bp were discarded. The genomic data were analyzed as described above.

### 437 *Phylogenetic and population structure analysis of ESBL-E. coli*

438 We used Prokka v.1.14.6<sup>69</sup> to annotate genomes and snippy v.4.6.0<sup>70</sup> to map the sequence  
439 reads to the ST131 Ec EC958 chromosome [HG941718.1]  
440 (<https://www.ncbi.nlm.nih.gov/nuccore/HG941718.1>) to create the core genome alignment.  
441 We used snp-dists v.0.8.2, (<https://github.com/tseemann/snp-dists/>) to create the SNP distance  
442 matrix from the core genome alignment. We used a 17 SNP cut-off to define similarity  
443 between two genomes and to identify probable ESBL-Ec transmission events among cases.<sup>37</sup>  
444 To assess the phylogenetic relatedness, we used the core SNP alignment to infer a maximum-  
445 likelihood tree using RAxML v.8.2.8 with the GTR + Gamma rate model and 100 rapid  
446 bootstraps visualized in iTol (v6.5.2).<sup>71,72</sup> ST131 subclades were determined based on  
447 subclade specific SNPs and *fimH* alleles, subclade membership was corrected when  
448 assignment based on SNP profile of sporadic isolates did not fit with the phylogenetic  
449 distribution of clades.<sup>25,30,62,73</sup>

### 450 *Statistical analysis*

451 Our primary analyses were multivariable logistic regression models, performed in two  
452 overlapping study populations with outcome variable ESBL-Ec gastrointestinal carriage using  
453 SPSS v.26.0 (SPSS, Inc., Chicago, IL, USA). First, we analyzed factors associated with



454 ESBL-Ec gastrointestinal carriage among 4,996 participants (Table 1). Next, in 2,972  
455 participants also screened for Kp,<sup>32</sup> we performed a multivariable logistic regression analysis  
456 including Kp carriage as an additional explanatory variable (Suppl. Table 2). Explanatory  
457 variables were selected with the help of a directed acyclic graph constructed using DAGitty  
458 v3.0 (Suppl. Figure 3 and 4).<sup>74</sup> All explanatory variables were kept in the fully adjusted  
459 models. Multicollinearity between the entered variables was assessed calculating the variance  
460 inflation factor (VIF) and tolerance statistic. Multicollinearity was not a problem with VIF>10  
461 and tolerance statistic <0.2.<sup>75</sup> The strength of the associations was examined by calculating  
462 AORs with 95% CI. Two-sided p-values <0.05 were considered statistically significant. The  
463 prevalence of ST131 among carrier and clinical isolates was compared calculating the OR  
464 with 95% CI using logistic regression in SPSS. The comparison of proportions was assessed  
465 using  $\chi^2$ -test.

#### 466 **Ethics**

467 The study was approved by the Regional Committee for Medical and Health Research Ethics,  
468 North Norway (REC North reference: 2016/1788 and 2014/940) and the Data Protection  
469 Officer at University Hospital of North Norway (reference: 2019/4264). The study complied  
470 with the Declaration of Helsinki. All participants in Tromsø<sup>7</sup> signed an informed consent  
471 form prior to participation.

#### 472 **Acknowledgements**

473 We are grateful for technical assistance from Bjørg Haldorsen, Bettina Aasnæs and Ellen  
474 Josefsen in organizing the collection of fecal samples in the laboratory, Eva Bernhoff and  
475 Ragna-Johanne Bakksjø for performing WGS, Marit Andrea Kløkkhammer Hetland for initial  
476 sequence analysis of carriage isolates. Rod Wolstenholme for figure editing. We thank

477 Sigma2, the national provider of e-infrastructure, for access to High-Performance Computing  
478 and large-scale data storage (Project ID: NN9794K).

479 Collaborators forming the Norwegian *E. coli* ESBL Study Group include: Nina Handal  
480 (Akershus University Hospital), Elisabeth Sirnes (Førde Hospital), Liv Jorunn Hafne  
481 (Haugesund Hospital), Paul Christoffer Lindemann (Haukeland University Hospital), Lovise  
482 Marie Norgaard (Innlandet Hospital), Kyriakos Zaragkoulias (Levanger Hospital), Einar  
483 Nilsen (Molde and Ålesund Hospital), Hege Elisabeth Larsen (Nordland Hospital), Marcela  
484 Pino (Oslo University Hospital, Rikshospitalet), Nils Olav Hermansen (Oslo University  
485 Hospital, Ullevål), Iren H. Löhr (Stavanger University Hospital), Aleksandra Jakovljevic (St.  
486 Olav University Hospital), Ståle Tofteland (Sørlandet Hospital), Kristina Papp (Unilabs  
487 Telelab), Gunnar Skov Simonsen (University Hospital of North Norway), Åshild Marvik  
488 (Vestfold Hospital), Nadine Durema Pullar (Vestre Viken, Bærum Hospital), Roar Magne  
489 Bævre-Jensen (Vestre Viken, Drammen Hospital), Anita Kanestrøm (Østfold Hospital).

490 **Author contributions:**

491 ØS conceptualized and acquired funding for the study in collaboration with AS, KG and IHL.  
492 ØS was responsible for organizing the collection of fecal samples. LLEA did the screening of  
493 fecal samples and phenotypic testing. NR, KS, LS and KG conceptualized and conducted the  
494 epidemiological analysis of risk factors. IHL organized WGS of carriage isolates. GSS and  
495 the Norwegian *E. coli* ESBL Study Group provided data and clinical isolates. DJB, AKP, NR  
496 and ØS analyzed the WGS data. NR, ØS, KS and KG prepared first manuscript draft. All  
497 authors contributed to review and editing of the manuscript and approved the final version.

498 **Declaration of interests:**

499 All authors report no conflicts of interest.

500 **Role of funding source**

501 This study was supported by grants from the Northern Norway Regional Health Authority  
502 (HNF1415-18) and the Trond Mohn Foundation (TMF2019TMT03). The funders of the study  
503 played no role in study design, data collection, data analysis, data interpretation, or writing of  
504 the report.

#### 505 **Data Availability**

506 Bacterial genome data (raw Illumina reads) are publicly available in NCBI under BioProject  
507 PRJEB53319 (NORM 2014 collection) and PRJEB57251 (Tromsø7 collection). This study is  
508 based on data owned by a third party (The Tromsø Study, Department of Community  
509 Medicine, UiT The Arctic University of Norway). Confidentiality requirements according to  
510 Norwegian law prevents sharing of individual patient level data in public repositories.  
511 Application of legal basis and exemption from professional secrecy requirements for the use  
512 of personal health data in research may be sent to a regional committee for medical and health  
513 research ethics (<https://rekportalen.no/>). The authors gained access to the data through the  
514 Tromsø Study's application process. Guidelines on how to access the data are available at the  
515 website <https://uit.no/research/tromsostudy>. All enquiries about the Tromsø Study should be  
516 sent by e-mail to [tromsous@ism.uit.no](mailto:tromsous@ism.uit.no). All the questionnaire variables are published in the  
517 NESSTAR program system and results can be viewed online:  
518 <http://tromsundersokelsen.uit.no/tromso/>.

#### 519 **References**

- 520 1. Antimicrobial Resistance C. Global burden of bacterial antimicrobial resistance in 2019: a  
521 systematic analysis. *Lancet*. 2022 Feb 12;399(10325):629-655.
- 522 2. NORM/NORM-VET 2021. Usage of antimicrobial agents and occurrence of antimicrobial  
523 resistance in Norway. Tromsø/Oslo/Ås; 2022. ISSN: 1502-2307 (print)/1890- 9965  
524 (electronic).
- 525 3. Schwaber MJ, Carmeli Y. Mortality and delay in effective therapy associated with  
526 extended-spectrum beta-lactamase production in Enterobacteriaceae bacteraemia: a  
527 systematic review and meta-analysis. *J Antimicrob Chemother*. 2007 Nov;60(5):913-20.

- 528 4. Scheuerman O, Schechner V, Carmeli Y, et al. Comparison of predictors and mortality  
529 between bloodstream infections caused by ESBL-producing *Escherichia coli* and ESBL-  
530 producing *Klebsiella pneumoniae*. *Infect Control Hosp Epidemiol*. 2018 Jun;39(6):660-667.
- 531 5. Tacconelli E, Carrara E, Savoldi A, et al. Discovery, research, and development of new  
532 antibiotics: the WHO priority list of antibiotic-resistant bacteria and tuberculosis. *Lancet*  
533 *Infect Dis*. 2018 Mar;18(3):318-327.
- 534 6. Prevel R, Boyer A, M'Zali F, et al. Extended spectrum beta-lactamase producing  
535 Enterobacterales faecal carriage in a medical intensive care unit: low rates of cross-  
536 transmission and infection. *Antimicrob Resist Infect Control*. 2019 Jul 10;8:112.
- 537 7. Wyres KL, Hawkey J, Mirceta M, et al. Genomic surveillance of antimicrobial resistant  
538 bacterial colonisation and infection in intensive care patients. *BMC Infect Dis*. 2021 Jul  
539 14;21(1):683.
- 540 8. Denkel LA, Maechler F, Schwab F, et al. Infections caused by extended-spectrum beta-  
541 lactamase-producing Enterobacterales after rectal colonization with ESBL-producing  
542 *Escherichia coli* or *Klebsiella pneumoniae*. *Clin Microbiol Infect*. 2020 Aug;26(8):1046-  
543 1051.
- 544 9. Woerther PL, Burdet C, Chachaty E, Andremont A. Trends in human fecal carriage of  
545 extended-spectrum beta-lactamases in the community: toward the globalization of CTX-M.  
546 *Clin Microbiol Rev*. 2013 Oct;26(4):744-58.
- 547 10. Bezabih YM, Sabiiti W, Alamneh E, et al. The global prevalence and trend of human  
548 intestinal carriage of ESBL-producing *Escherichia coli* in the community. *J Antimicrob*  
549 *Chemother*. 2021 Jan 1;76(1):22-29.
- 550 11. Jernigan JA, Hatfield KM, Wolford H, et al. Multidrug-Resistant Bacterial Infections in  
551 U.S. Hospitalized Patients, 2012-2017. *N Engl J Med*. 2020 Apr 2;382(14):1309-1319.
- 552 12. Mughini-Gras L, Dorado-Garcia A, van Duijkeren E, et al. Attributable sources of  
553 community-acquired carriage of *Escherichia coli* containing beta-lactam antibiotic resistance  
554 genes: a population-based modelling study. *Lancet Planet Health*. 2019 Aug;3(8):e357-e369.
- 555 13. Ny S, Lofmark S, Borjesson S, et al. Community carriage of ESBL-producing  
556 *Escherichia coli* is associated with strains of low pathogenicity: a Swedish nationwide study.  
557 *J Antimicrob Chemother*. 2017 Feb;72(2):582-588.
- 558 14. van den Bunt G, van Pelt W, Hidalgo L, et al. Prevalence, risk factors and genetic  
559 characterisation of extended-spectrum beta-lactamase and carbapenemase-producing  
560 Enterobacteriaceae (ESBL-E and CPE): a community-based cross-sectional study, the  
561 Netherlands, 2014 to 2016. *Euro Surveill*. 2019 Oct;24(41):1800594.
- 562 15. Arcilla MS, van Hattem JM, Haverkate MR, et al. Import and spread of extended-  
563 spectrum beta-lactamase-producing Enterobacteriaceae by international travellers (COMBAT  
564 study): a prospective, multicentre cohort study. *Lancet Infect Dis*. 2017 Jan;17(1):78-85.
- 565 16. Jorgensen SB, Samuelsen O, Sundsfjord A, et al. High prevalence of faecal carriage of  
566 ESBL-producing Enterobacteriaceae in Norwegian patients with gastroenteritis. *Scand J*  
567 *Infect Dis*. 2014 Jun;46(6):462-5.
- 568 17. Ulstad CR, Solheim M, Berg S, Lindbaek M, Dahle UR, Wester AL. Carriage of  
569 ESBL/AmpC-producing or ciprofloxacin non-susceptible *Escherichia coli* and *Klebsiella* spp.  
570 in healthy people in Norway. *Antimicrob Resist Infect Control*. 2016 Dec 15;5:57.
- 571 18. Kohler P, Seiffert SN, Kessler S, et al. Molecular Epidemiology and Risk Factors for  
572 Extended-Spectrum beta-Lactamase-Producing Enterobacterales in Long-Term Care  
573 Residents. *J Am Med Dir Assoc*. 2022 Mar;23(3):475-481.e5.
- 574 19. Rettedal S, Lohr IH, Bernhoff E, Natas OB, Sundsfjord A, Oymar K. Extended-spectrum  
575 beta-lactamase-producing Enterobacteriaceae among pregnant women in Norway: prevalence  
576 and maternal-neonatal transmission. *J Perinatol*. 2015 Nov;35(11):907-12.

- 577 20. Birgy A, Cohen R, Levy C, et al. Community faecal carriage of extended-spectrum beta-  
578 lactamase-producing Enterobacteriaceae in French children. *BMC Infect Dis*. 2012 Nov  
579 21;12:315.
- 580 21. Wielders CCH, van Hoek A, Hengeveld PD, et al. Extended-spectrum  $\beta$ -lactamase- and  
581 pAmpC-producing Enterobacteriaceae among the general population in a livestock-dense  
582 area. *Clin Microbiol Infect*. 2017 Feb;23(2):120.e1-120.e8.
- 583 22. Karanika S, Karantanos T, Arvanitis M, Grigoras C, Mylonakis E. Fecal colonization with  
584 extended-spectrum beta-lactamase-producing Enterobacteriaceae and risk factors among  
585 healthy individuals: A systematic review and metaanalysis. *Clin Infect Dis*. 2016 Aug  
586 1;63(3):310-8.
- 587 23. Richelsen R, Smit J, Laxsen Anru P, Schønheyder HC, Nielsen H. Risk factors of  
588 community-onset extended-spectrum  $\beta$ -lactamase *Escherichia coli* and *Klebsiella*  
589 *pneumoniae* bacteraemia: an 11-year population-based case-control-control study in  
590 Denmark. *Clin Microbiol Infect*. 2021 Jun;27(6):871-877.
- 591 24. Leistner R, Meyer E, Gastmeier P, et al. Risk factors associated with the community-  
592 acquired colonization of extended-spectrum beta-lactamase (ESBL) positive *Escherichia coli*.  
593 an exploratory case-control study. *PLoS One*. 2013 Sep 11;8(9):e74323.
- 594 25. Gladstone RA, McNally A, Pontinen AK, et al. Emergence and dissemination of  
595 antimicrobial resistance in *Escherichia coli* causing bloodstream infections in Norway in  
596 2002-17: a nationwide, longitudinal, microbial population genomic study. *Lancet Microbe*.  
597 2021 Jul;2(7):e331-e341.
- 598 26. Fostervold A, Hetland MAK, Bakksjø R, et al. A nationwide genomic study of clinical  
599 *Klebsiella pneumoniae* in Norway 2001-2015: Introduction and spread of ESBL facilitated by  
600 CG15 and CG307. *J Antimicrob Chemother*. 2022 Feb 23;77(3):665-674.
- 601 27. Dunn SJ, Connor C, McNally A. The evolution and transmission of multi-drug resistant  
602 *Escherichia coli* and *Klebsiella pneumoniae*: the complexity of clones and plasmids. *Curr*  
603 *Opin Microbiol*. 2019 Oct;51:51-56.
- 604 28. Manges AR, Geum HM, Guo A, Edens TJ, Fibke CD, Pitout JDD. Global extraintestinal  
605 pathogenic *Escherichia coli* (ExPEC) lineages. *Clin Microbiol Rev*. 2019 Jun  
606 12;32(3):e00135-18.
- 607 29. Kallonen T, Brodrick HJ, Harris SR, et al. Systematic longitudinal survey of invasive  
608 *Escherichia coli* in England demonstrates a stable population structure only transiently  
609 disturbed by the emergence of ST131. *Genome Res*. 2017 Jul 18;27(8):1437-1449.
- 610 30. Ben Zakour NL, Alsheikh-Hussain AS, Ashcroft MM, et al. Sequential acquisition of  
611 virulence and fluoroquinolone resistance has shaped the evolution of *Escherichia coli* ST131.  
612 *mBio*. 2016 Apr 26;7(2):e00347-16.
- 613 31. Hopstock LA, Grimsgaard S, Johansen H, Kanstad K, Wilsgaard T, Eggen AE. The  
614 seventh survey of the Tromsø Study (Tromsø7) 2015-2016: study design, data collection,  
615 attendance, and prevalence of risk factors and disease in a multipurpose population-based  
616 health survey. *Scand J Public Health*. 2022 Nov;50(7):919-929.
- 617 32. Raffelsberger N, Hetland MAK, Svendsen K, et al. Gastrointestinal carriage of *Klebsiella*  
618 *pneumoniae* in a general adult population: a cross-sectional study of risk factors and bacterial  
619 genomic diversity. *Gut Microbes*. 2021 Jan-Dec;13(1):1939599.
- 620 33. Willems RPJ, van Dijk K, Ket JCF, Vandenbroucke-Grauls C. Evaluation of the  
621 association between gastric acid suppression and risk of intestinal colonization with  
622 multidrug-resistant microorganisms: A systematic review and meta-analysis. *JAMA Intern*  
623 *Med*. 2020 Apr 1;180(4):561-571.
- 624 34. Reuland EA, Al Naiemi N, Kaiser AM, et al. Prevalence and risk factors for carriage of  
625 ESBL-producing Enterobacteriaceae in Amsterdam. *J Antimicrob Chemother*. 2016  
626 Apr;71(4):1076-82.



- 627 35. Johnson JR, Johnston BD, Porter SB, et al. Rapid emergence, subsidence, and molecular  
628 detection of *Escherichia coli* sequence type 1193-fimH64, a new disseminated multidrug-  
629 resistant commensal and extraintestinal pathogen. *J Clin Microbiol.* 2019 Apr  
630 26;57(5):e01664-18.
- 631 36. Tchesnokova V, Radey M, Chattopadhyay S, et al. Pandemic fluoroquinolone resistant  
632 *Escherichia coli* clone ST1193 emerged via simultaneous homologous recombinations in 11  
633 gene loci. *Proc Natl Acad Sci U S A.* 2019 Jul 16;116(29):14740-14748.
- 634 37. Ludden C, Coll F, Gouliouris T, et al. Defining nosocomial transmission of *Escherichia*  
635 *coli* and antimicrobial resistance genes: a genomic surveillance study. *Lancet Microbe.* 2021  
636 Sep;2(9):e472-e480.
- 637 38. Nicolas-Chanoine MH, Bertrand X, Madec JY. *Escherichia coli* ST131, an intriguing  
638 clonal group. *Clin Microbiol Rev.* 2014 Jul;27(3):543-74.
- 639 39. Tenaillon O, Skurnik D, Picard B, Denamur E. The population genetics of commensal  
640 *Escherichia coli*. *Nat Rev Microbiol.* 2010 Mar;8(3):207-17.
- 641 40. Denamur E, Clermont O, Bonacorsi S, Gordon D. The population genetics of pathogenic  
642 *Escherichia coli*. *Nat Rev Microbiol.* 2021 Jan;19(1):37-54.
- 643 41. Marin J, Clermont O, Royer G, et al. The population genomics of increased virulence and  
644 antibiotic resistance in human commensal *Escherichia coli* over 30 years in France. *Appl*  
645 *Environ Microbiol.* 2022 Aug 9;88(15):e0066422.
- 646 42. NORM/NORM-VET 2016. Usage of antimicrobial agents and occurrence of antimicrobial  
647 resistance in Norway. Tromsø/Oslo; 2017. ISSN: 1502-2307 (print)/1890- 9965 (electronic).
- 648 43. Health NIO. ESBL-holdige gramnegative stavbakterier - smitteverntiltak i  
649 helseinstitusjoner. 2015. [https://www.fhi.no/sv/forebygging-i-helsetjenesten/smittevern-i-  
650 institusjoner/tiltak/esbl-holdige-gramnegative-stavbakte/](https://www.fhi.no/sv/forebygging-i-helsetjenesten/smittevern-i-institusjoner/tiltak/esbl-holdige-gramnegative-stavbakte/).
- 651 44. Ostholm-Balkhed A, Tarnberg M, Nilsson M, et al. Travel-associated faecal colonization  
652 with ESBL-producing Enterobacteriaceae: incidence and risk factors. *J Antimicrob*  
653 *Chemother*  
654 . 2013 Sep;68(9):2144-53.
- 655 45. Nicolas-Chanoine MH, Gruson C, Bialek-Davenet S, et al. 10-Fold increase (2006-11) in  
656 the rate of healthy subjects with extended-spectrum  $\beta$ -lactamase-producing *Escherichia coli*  
657 faecal carriage in a Parisian check-up centre. *J Antimicrob Chemother.* 2013 Mar;68(3):562-8.
- 658 46. Søgaaard M, Heide-Jørgensen U, Vandenbroucke JP, Schønheyder HC, Vandenbroucke-  
659 Grauls C. Risk factors for extended-spectrum  $\beta$ -lactamase-producing *Escherichia coli* urinary  
660 tract infection in the community in Denmark: a case-control study. *Clin Microbiol Infect.*  
661 2017 Dec;23(12):952-960.
- 662 47. Vihta K-D, Stoesser N, Llewelyn MJ, et al. Trends over time in *Escherichia coli*  
663 bloodstream infections, urinary tract infections, and antibiotic susceptibilities in Oxfordshire,  
664 UK, 1998–2016: a study of electronic health records. *Lancet Infect Dis.* 2018  
665 Oct;18(10):1138-1149.
- 666 48. Thaden JT, Fowler VG, Sexton DJ, Anderson DJ. Increasing incidence of extended-  
667 spectrum  $\beta$ -lactamase-producing *Escherichia coli* in community hospitals throughout the  
668 Southeastern United States. *Infect Control Hosp Epidemiol.* 2016 Jan;37(1):49-54.
- 669 49. Reddy P, Malczynski M, Obias A, et al. Screening for extended-spectrum  $\beta$ -lactamase-  
670 producing Enterobacteriaceae among high-risk patients and rates of subsequent bacteremia.  
671 *Clin Infect Dis.* 2007 Oct 1;45(7):846-52.
- 672 50. Collingwood A, Blostein F, Seekatz AM, et al. Epidemiological and microbiome  
673 associations between *Klebsiella pneumoniae* and vancomycin-resistant *Enterococcus*  
674 colonization in intensive care unit patients. *Open Forum Infect Dis.* 2020 Jan 12;7(1):ofaa012.

- 675 51. Matuschek E, Brown DF, Kahlmeter G. Development of the EUCAST disk diffusion  
676 antimicrobial susceptibility testing method and its implementation in routine microbiology  
677 laboratories. *Clin Microbiol Infect.* 2014 Apr;20(4):O255-66.
- 678 52. Krueger F. TrimGalore. 2019. <https://github.com/FelixKrueger/TrimGalore> (accessed  
679 August 2019).
- 680 53. Wick RR, Judd LM, Gorrie CL, Holt KE. Unicycler: Resolving bacterial genome  
681 assemblies from short and long sequencing reads. *PLoS Comput Biol.* 2017 Jun  
682 8;13(6):e1005595.
- 683 54. Bankevich A, Nurk S, Antipov D, et al. SPAdes: a new genome assembly algorithm and  
684 its applications to single-cell sequencing. *J Comput Biol.* 2012 May;19(5):455-77.
- 685 55. Jolley KA, Bray JE, Maiden MCJ. Open-access bacterial population genomics: BIGSdb  
686 software, the PubMLST.org website and their applications. *Wellcome Open Res.* 2018 Sep  
687 24;3:124.
- 688 56. Seemann T. mlst Github. 2021. <https://github.com/tseemann/mlst2021>).
- 689 57. Zhou Z, Alikhan NF, Mohamed K, Fan Y, Achtman M. The Enterobase user's guide, with  
690 case studies on *Salmonella* transmissions, *Yersinia pestis* phylogeny, and *Escherichia* core  
691 genomic diversity. *Genome Res.* 2020 Jan;30(1):138-152.
- 692 58. Feldgarden M, Brover V, Gonzalez-Escalona N, et al. AMRFinderPlus and the reference  
693 gene catalog facilitate examination of the genomic links among antimicrobial resistance,  
694 stress response, and virulence. *Sci Rep.* 2021 Jun 16;11(1):12728.
- 695 59. Carattoli A, Zankari E, Garcia-Fernandez A, et al. In silico detection and typing of  
696 plasmids using PlasmidFinder and plasmid multilocus sequence typing. *Antimicrob Agents  
697 Chemother.* 2014 Jul;58(7):3895-903.
- 698 60. Seemann T. *Abricate*, Github. 2019. <https://github.com/tseemann/abricate>.
- 699 61. Beghain J, Bridier-Nahmias A, Le Nagard H, Denamur E, Clermont O. ClermonTyping:  
700 an easy-to-use and accurate in silico method for *Escherichia* genus strain phylotyping. *Microb  
701 Genom.* 2018 Jul;4(7):e000192.
- 702 62. Roer L, Tchesnokova V, Allesøe R, et al. Development of a web tool for *Escherichia coli*  
703 subtyping based on *fimH* alleles. *J Clin Microbiol.* 2017 Aug;55(8):2538-2543.
- 704 63. Madden T. The BLAST sequence analysis tool. in: McEntyre J OJ, editor.  
705 <http://www.ncbi.nlm.nih.gov/books/NBK21097/>: The NCBI Handbook. Bethesda (MD):  
706 National Center for Biotechnology Information (US); 2002-. Chapter 16.; 2002.
- 707 64. Lam MM, Wick RR, Wyres KL, Holt KE. A genomic surveillance framework and  
708 genotyping tool for *Klebsiella pneumoniae* and its related species complex *Nat Commun.*  
709 2021 Jul 7;12(1):4188.
- 710 65. Lam MMC, Wyres KL, Judd LM, et al. Tracking key virulence loci encoding aerobactin  
711 and salmochelin siderophore synthesis in *Klebsiella pneumoniae*. *Genome Med.* 2018 Oct  
712 29;10(1):77.
- 713 66. NORM/NORM-VET 2014. Usage of antimicrobial agents and occurrence of antimicrobial  
714 resistance in Norway. Tromsø/Oslo; 2015. ISSN: 1502-2307 (print)/1890- 9965 (electronic).
- 715 67. Bolger AM, Lohse M, Usadel B. Trimmomatic: a flexible trimmer for Illumina sequence  
716 data. *Bioinformatics.* 2014 Aug 1;30(15):2114-20.
- 717 68. Prjibelski A, Antipov D, Meleshko D, Lapidus A, Korobeynikov A. Using SPAdes *de  
718 novo* assembler. *Curr Protoc Bioinformatics.* 2020 Jun;70(1):e102.
- 719 69. Seemann T. Prokka: rapid prokaryotic genome annotation. *Bioinformatics.* 2014 Jul  
720 15;30(14):2068-9.
- 721 70. Seemann T. snippy: fast bacterial variant calling from NGS reads. 2015.  
722 <https://github.com/tseemann/snippy>.
- 723 71. Stamatakis A. RAxML version 8: a tool for phylogenetic analysis and post-analysis of  
724 large phylogenies. *Bioinformatics* 2014 May 1;30(9):1312-3.

- 725 72. Letunic I, Bork P. Interactive tree of life (iTOL) v5: an online tool for phylogenetic tree  
726 display and annotation. *Nucleic Acids Res.* 2021 Jul 2;49(W1):W293-W296.
- 727 73. Price LB, Johnson JR, Aziz M, et al. The epidemic of extended-spectrum-beta-lactamase-  
728 producing *Escherichia coli* ST131 is driven by a single highly pathogenic subclone, H30-Rx.  
729 *mBio.* 2013 Dec 17;4(6):e00377-13.
- 730 74. Textor J, van der Zander B, Gilthorpe MS, Liskiewicz M, Ellison GT. Robust causal  
731 inference using directed acyclic graphs: the R package 'dagitty'. *Int J Epidemiol.* 2016 Dec  
732 1;45(6):1887-1894.
- 733 75. Field A. Discovering statistics using IBM SPSS statistics: SAGE Publications Ltd; 2017.
- 734
